# Supplementary material
Source: PubMed Central journal article supplement (PMC7535796)

# THE LANCET

## Rheumatology

### Supplementary appendix

This appendix formed part of the original submission. We post it as supplied by the authors.

Supplement to: Parisi S, Borrelli R, Bianchi S, Fusaro E. Viral arthritis and COVID-19. *Lancet Rheumatol* 2020; published online Oct 5. [https://doi.org/10.1016/S2665-9913\(20\)30348-9](https://doi.org/10.1016/S2665-9913(20)30348-9).

Table 1. Rheumatological clinical features of viral arthritis

| Virus                                                | Group       | Arthralgia/Arthritis | Notes                                                                                                                                                        |
|------------------------------------------------------|-------------|----------------------|--------------------------------------------------------------------------------------------------------------------------------------------------------------|
| Parvovirus B19                                       | II – ssDNA  | ++/++                | Child: asymmetric, large joint, oligoarticular Adult: RA-like                                                                                                |
| HBV                                                  | VII – dsDNA | +/+                  | RA like, no erosive                                                                                                                                          |
| Herpesviridae:<br>HSV 1,2<br>CMV<br>EBV              | I - dsDNA   | ++/++                | CMV: possible severe arthritis in immunosuppressed patients                                                                                                  |
| HIV                                                  | VI – ssRNA  | ++/++                | Usually affects hands and wrists                                                                                                                             |
| HCV                                                  | IV – ssRNA  | ++/++                | Associated with vasculitis and cryoglobulinemia, no erosive                                                                                                  |
| HTLV-1                                               | VI - ssRNA  | ++/++                | Oligoarticular (usually shoulder, wrist e knee)<br>Polyarticular: fever, myalgia e skin lesions                                                              |
| Alphavirus:<br>CHIKV<br>RRV<br>SINV<br>O'nyong-nyong | IV – ssRNA  | ++/++                | CHIKV: symmetric, large and small joints (>10), tenosynovitis, tunnel carpal syndrome and Raynaud phenomenon<br>RRV: large and small joints, especially knee |
| Flavivirus:<br>Dengue                                |             | ++/++                |                                                                                                                                                              |
| Rubella virus                                        | IV – ssRNA  | +/+                  | symmetric, large and small joints, tenosynovitis, tunnel carpal syndrome                                                                                     |
| Coxsackievirus                                       | IV – ssRNA  | ++/++                | polyarticular, sometimes severe                                                                                                                              |
| Measles virus<br>Mumps<br>orthorubulavirus           | V - ssRNA   | +/+<br>+/+           | large and small joints                                                                                                                                       |
| New coronavirus<br>SARS – CoV-2                      | IV - ssRNA  | ++/?                 | mono-oligoarticular cases reported                                                                                                                           |

HBV, Hepatitis B Virus; HSV, Herpes Simplex Virus; CMV, Cytomegalovirus; EBV, Epstein Barr Virus; HIV, Human Immunodeficiency Virus; HCV, Hepatitis C Virus; HTLV-1, Human T-lymphotropic virus; CHIKV, Chikungunya Virus; RRV, Ross River Virus; SINV, Sindbis virus; +, not frequent; ++, frequent.

Fig.1 Left Ankle Ultrasound with Esaote MyLab 70 XVG linear probe 6-18 MHz. Power Doppler signal present inside the green box.

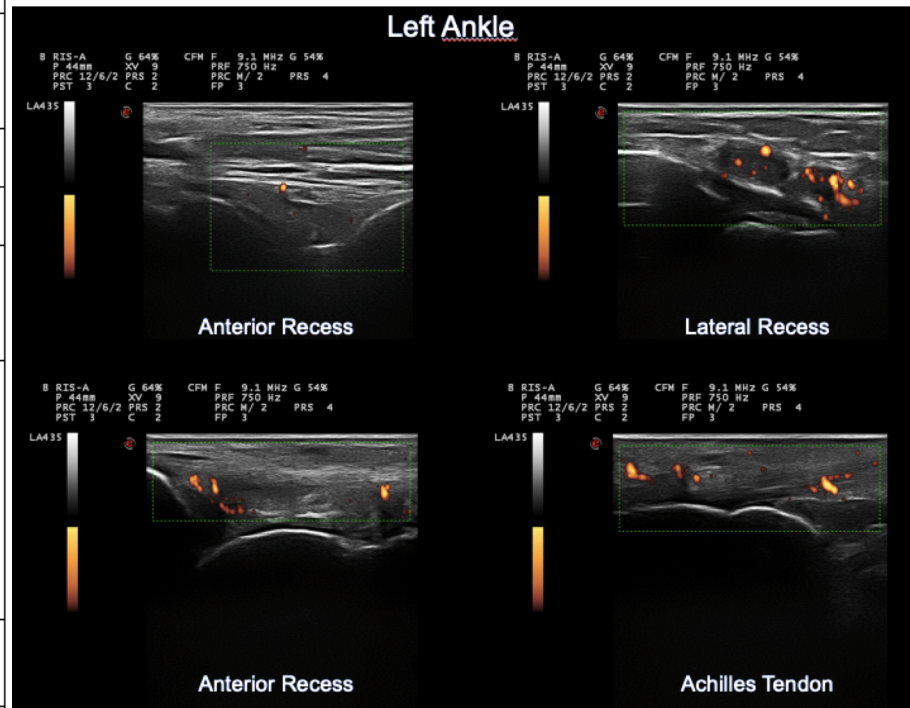

Supplement: mmc1.pdf [file mmc1.pdf]
